# Supplementary material for: Mechanism of Stability and Transport of Chitosan-Stabilized Nano Zero-Valent Iron in Saturated Porous Media
Source: MDPI journal article supplement (doi:10.3390/ijerph18105115), 2021-05-12
Supplement: s1 [file s1]

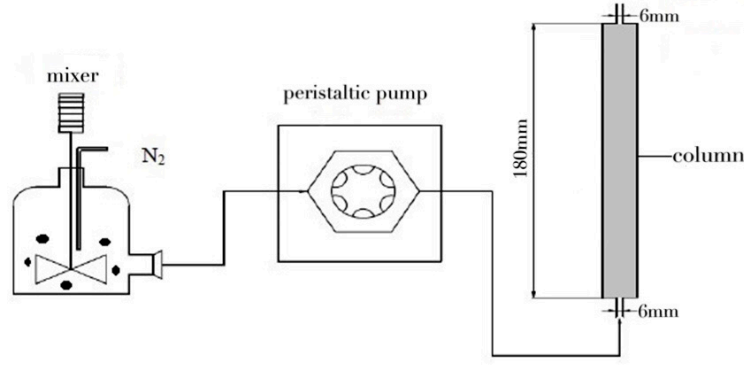

**Figure S1.** Transport experimental device

**Table S1.** Measurement data and SD of zeta potential at different pH.

|   | Test 1 (eV) | Test 2 (eV) | Test 3 (eV) | Mean value (eV) | SD      | Lable          |
|---|-------------|-------------|-------------|-----------------|---------|----------------|
| 1 | 3.12        | 2.48        | 2.32        | 2.64            | 0.42332 | a <sup>1</sup> |
| 2 | -14.42      | -12.86      | -13.34      | -13.54          | 0.799   | b <sup>1</sup> |
| 3 | -16.81      | -15.52      | -15.64      | -15.99          | 0.71267 | c <sup>1</sup> |

<sup>1</sup> The letters a, b and c show the statistically significant differences between variables.

**Table S2.** Measurement data and SD of zeta potential at different ionic strength.

|                   | Test 1 (eV) | Test 2 (eV) | Test 3 (eV) | Mean value (eV) | SD      | Lable          |
|-------------------|-------------|-------------|-------------|-----------------|---------|----------------|
| NaCl              |             |             |             |                 |         |                |
| 1                 | -13         | -14.3       | -13.4       | -13.54          | 0.6421  | a <sup>1</sup> |
| 2                 | -8.26       | -9.32       | -9.36       | -8.98           | 0.6239  | a <sup>1</sup> |
| 3                 | -0.98       | -1.29       | -1.27       | -1.18           | 0.1735  | b <sup>1</sup> |
| CaCl <sub>2</sub> |             |             |             |                 |         |                |
| 1                 | -12.4       | -13.9       | -14.3       | -13.54          | 1.00732 | c <sup>1</sup> |
| 2                 | -1.26       | -0.83       | -1.06       | -1.05           | 0.21517 | d <sup>1</sup> |
| 3                 | -0.91       | -0.59       | -0.72       | -0.74           | 0.16093 | e <sup>1</sup> |

<sup>1</sup> The letters a, b, c, d and e show the statistically significant differences between variables.

**Table S3.** The meanings of model parameters

| Parameter | Calculation formula                        | Physical meaning                                                                                                                               |
|-----------|--------------------------------------------|------------------------------------------------------------------------------------------------------------------------------------------------|
| $N_R$     | $\frac{d_p}{d_c}$                          | The ratio of particle size to that of porous media                                                                                             |
| $N_{Pe}$  | $\frac{Ud_c}{D_\infty}$                    | Represents the ratio of convection to diffusion                                                                                                |
| $N_{vdw}$ | $\frac{A}{kT}$                             | Van der Waals number, which represents the ratio of van der Waals effect to particle heat energy                                               |
| $N_{gr}$  | $\frac{4\pi a_p^4(\rho_p - \rho_f)g}{3kT}$ | Gravity number. The ratio of gravitational potential energy to thermal energy of particles at a radius of porous media                         |
| $N_A$     | $\frac{A}{12\pi\mu Ua_p^2}$                | Attraction number. It represents the comprehensive influence of van der Waals gravity and fluid velocity on the deposition rate of intercepted |

particles.

|       |                                                                     |                                                                                      |
|-------|---------------------------------------------------------------------|--------------------------------------------------------------------------------------|
| $N_G$ | $\frac{2a_p^2(\rho_p - \rho_f)g}{9\mu U}$                           | Gravity number, the ratio of settling velocity of Stokes particles to fluid velocity |
| $A_S$ | $\frac{2(1 - \lambda^5)}{(2 - 3\lambda + 3\lambda^5 - 2\lambda^6)}$ | Porosity related parameters of semipell model                                        |

The meanings of the parameters in the table are as follows:  $\eta_I$  is the contact efficiency produced by the interception mechanism;  $\eta_G$  is the contact efficiency caused by gravity sedimentation;  $\eta_D$  is the contact efficiency caused by Brownian diffusion;  $d_p$  is the particle diameter (665 nm),  $d_c$  is the particle diameter of porous media (1.5 mm),  $U$  is the fluid approach velocity (0.0212 cm/s),  $D_\infty$  is the bulk diffusion coefficient (described by Stokes Einstein equation),  $A$  is the Hamaker constant ( $1.0 \times 10^{-20}$  J),  $k$  is the Boltzmann constant ( $1.38 \times 10^{-23}$  J•K<sup>-1</sup>),  $T$  is fluid absolute temperature (298 K),  $a_p$  is particle radius,  $\rho_p$  is the particle density (7.86 g/cm<sup>3</sup>),  $\rho_f$  is the fluid density (1 g/cm<sup>3</sup>),  $\mu$  is the absolute fluid viscosity ( $0.8937 \times 10^{-3}$  Pa•s<sup>-1</sup>), and  $g$  is the gravitational acceleration ( $9.8 \text{ m} \cdot \text{s}^{-2}$ ).

**Table S4.** Single-collector contact efficiency  $\eta_0$ , attachment efficiency  $\alpha$  and Maximum transport distance  $L_{max}$  in different conditions

| Influence factor                 | $\eta_G$ | $\eta_D$ | $\eta_I$ | $\eta_0$ | $\alpha$ | $L_{max}/\text{cm}$ |
|----------------------------------|----------|----------|----------|----------|----------|---------------------|
| pH = 6                           | 0.00763  | 0.00144  | 0.00003  | 0.0091   | 1.79     | 71.87               |
| pH = 7                           | 0.00763  | 0.00144  | 0.00003  | 0.0091   | 1.15     | 111.89              |
| pH = 8                           | 0.00763  | 0.00144  | 0.00003  | 0.0091   | 1.09     | 118.04              |
| 0 mol/kg                         | 0.00763  | 0.00144  | 0.00003  | 0.0091   | 1.15     | 111.89              |
| 0.03 mol/kg (NaCl)               | 0.00763  | 0.00144  | 0.00003  | 0.0091   | 2.28     | 56.43               |
| 0.1 mol/kg (NaCl)                | 0.00753  | 0.00144  | 0.00003  | 0.009    | 3.36     | 38.29               |
| 0.03 mol/kg (CaCl <sub>2</sub> ) | 0.00763  | 0.00144  | 0.00003  | 0.0091   | 3.98     | 32.69               |
| 9 mL/min                         | 0.00763  | 0.00144  | 0.00003  | 0.0091   | 1.15     | 111.89              |
| 18 mL/min                        | 0.00353  | 0.00088  | 0.00003  | 0.0044   | 1.39     | 189.71              |

**Table S5.** Parameters for attachment–detachment model Measured / calculated parameters

| Injection rate<br>(mL • min <sup>-1</sup> ) | Permeability coefficient<br>(cm • min <sup>-1</sup> ) | Dispersion coefficient<br>(cm <sup>2</sup> • min <sup>-1</sup> ) | Saturated volume moisture content          | Sand bulk density (g • cm <sup>-3</sup> ) | Particle deposition rate coefficient<br>(min <sup>-1</sup> ) |
|---------------------------------------------|-------------------------------------------------------|------------------------------------------------------------------|--------------------------------------------|-------------------------------------------|--------------------------------------------------------------|
| 9                                           | 4.64                                                  | 0.43                                                             | 0.41                                       | 1.5                                       | 0.192                                                        |
| 18                                          | 4.64                                                  | 0.43                                                             | 0.41                                       | 1.5                                       | 0.114                                                        |
| Calibration parameters                      |                                                       |                                                                  |                                            |                                           |                                                              |
| Injection rate<br>(mL • min <sup>-1</sup> ) | Straining coefficient<br>(min <sup>-1</sup> )         | Detachment coefficient<br>(min <sup>-1</sup> )                   | Fitting parameters of spatial distribution |                                           |                                                              |
| 9                                           | 1.88                                                  | 0.01                                                             | 0.43                                       |                                           |                                                              |
| 18                                          | 3.8                                                   | 0.06                                                             | 0.43                                       |                                           |                                                              |
